# Supplementary material
Source: publisher figshare collection journal article supplement (https://gsajournals.figshare.com/ndownloader/files/14887637)
Supplement: Supplementary file 1 [file 14887637]

| Species | Cellular component | Molecular function | Biological process | Total GO |
| --- | --- | --- | --- | --- |
| *E. multiflora* | 142,392 (27.6%) | 180,998 (35.0%) | 193,403 (37.4%) | 516,793 |
| *E. floccifolia* | 172,785 (27.2%) | 224,107 (35.3%) | 237,457 (37.4%) | 634,349 |
| *E. tristachya* | 155,857 (26.9%) | 205,303 (35.5%) | 217,471 (37.6%) | 578,631 |
| *E. intermedia* | 216,357 (26.9%) | 281,597 (35.0%) | 305,591 (38.0%) | 803,545 |
| *E. africana* | 269,158 (27.0%) | 355,928 (35.7%) | 371,283 (37.3%) | 996,369 |
| *E. coracana* | 275,677 (26.5%) | 374,256 (36.0%) | 389,648 (37.5%) | 1,039,581 |
| *E. indica* | 76,620 (27.7%) | 94,054 (34.0%) | 106,302 (38.4%) | 276,976 |
